# A Step Towards Seascape Scale Conservation: Using Vessel Monitoring Systems (VMS) to Map Fishing Activity

Matthew J. Witt, Brendan J. Godley\*

Centre for Ecology and Conservation, University of Exeter, Penryn, Cornwall, United Kingdom

**Background.** Conservation of marine ecosystems will require a holistic understanding of fisheries with concurrent spatial patterns of biodiversity. **Methodology/Principal Findings.** Using data from the UK Government Vessel Monitoring System (VMS) deployed on UK-registered large fishing vessels we investigate patterns of fisheries activity on annual and seasonal scales. Analysis of VMS data shows that regions of the UK European continental shelf (i.e. Western Channel and Celtic Sea, Northern North Sea and the Goban Spur) receive consistently greater fisheries pressure than the rest of the UK continental shelf fishing zone. **Conclusions/Significance.** VMS provides a unique and independent method from which to derive patterns of spatially and temporally explicit fisheries activity. Such information may feed into ecosystem management plans seeking to achieve sustainable fisheries while minimising putative risk to non-target species (e.g. cetaceans, seabirds and elasmobranchs) and habitats of conservation concern. With multilateral collaboration VMS technologies may offer an important solution to quantifying and managing ecosystem disturbance, particularly on the high-seas.

Citation: Witt MJ, Godley BJ (2007) A Step Towards Seascape Scale Conservation: Using Vessel Monitoring Systems (VMS) to Map Fishing Activity. PLoS ONE 2(10): e1111. doi:10.1371/journal.pone.0001111

## INTRODUCTION

For global commercial fisheries to maintain a sustainable future [1,2] there is a need to develop and implement ecosystem management plans that enable managed exploitation of fish stocks while mitigating against bycatch [3–7]. These goals are most likely to be achieved through the development of spatially explicit models on the distribution of fisheries activity, commercially desirable fish stocks and non-target species and habitats.

Knowledge regarding the spatial ecology of non-target species of conservation concern (e.g. cetaceans, elasmobranchs, turtles and seabirds) is ever-growing from boat and aerial surveys [8], an increasing array of electronic tagging and tracking methods [9,10], plus molecular and other forensic techniques [11,12]. Analyses of capture records from vessels carrying independent observers have both elucidated the ecology of non-target species but also provided effort-corrected and temporally and spatially relevant insights into the magnitude of impacts of different gear types [13–15].

Creating a generalised, yet spatially and temporally explicit, understanding of fisheries effort with which to evaluate potential capture of target stocks and minimise putative risk to non-target species and habitats is far from trivial. Information on the at-sea distribution and behaviour of fishing vessels may be obtained from routine and opportunistic surveillance by enforcement agencies using boats and planes, but these approaches lack spatial and/or temporal coverage. Catch-book data can be used but are subject to potential biases in reporting [5]. Vessel Monitoring Systems (VMS) deployed by several nations on large commercial fishing vessels [16] could however provide patterns of fisheries activity as they have good temporal and spatial coverage and are catch-book and vessel-master independent.

In the Europe Union, VMS operates on larger vessels of Member States fishing fleets ( $\geq 15$  m overall length). Such vessels employ a range of fishing techniques to exploit demersal and pelagic fish species (e.g. dredging, beam trawling, pair-trawling, gill netting and longlining). These techniques have their respective degrees of selectivity for both their intended catch species but also non-target species and variable impacts on habitats. For example, small cetacean bycatch is commonly associated with bottom set gill-netting and pair trawling [17], whereas dredging is more harmful to benthic habitats [18].

Here we investigate the utility of data from the UK VMS to describe patterns of at-sea space use by large UK-registered fishing vessels. Such data may ultimately inform seascape scale conservation by feeding into marine spatial planning activities [19] that should ensure sustainable persistence of commercial fisheries and effective mitigation of putative risk to species and habitats of conservation concern.

## RESULTS

Mapping of VMS data highlights considerable heterogeneity in space use (Figure 1a). Regions of the UK continental shelf and the European continental shelf-edge (i.e. Western Channel and Celtic Sea, Northern North Sea and the Goban Spur) receive appreciable fisheries pressure. Shelf habitats ( $\geq 25$  m and  $\leq 150$  m depth, 85% of the UK declared fishing zone), received 64.1% of fisheries activity. Shelf-edge habitats ( $\geq 150$  m and  $< 250$  m depth), which are not exclusively within the UK declared fishing zone, received 16.6% of fisheries activity.

To validate the presented fishing patterns (Figure 1a) we mapped sea fisheries statistics for landings of demersal and pelagic fish (Figure 1b), by area of capture, landed by UK-registered vessels during 2004 (presented in ICES statistical reporting boxes) [20]. When comparing these figures to the mean annual pattern of fisheries activity (Figure 1a) we see there is a statistically significant

.....  
**Academic Editor:** Ross Thompson, Monash University, Australia

**Received** September 5, 2007; **Accepted** September 28, 2007; **Published** October 31, 2007

**Copyright:** © 2007 Witt, Godley. This is an open-access article distributed under the terms of the Creative Commons Attribution License, which permits unrestricted use, distribution, and reproduction in any medium, provided the original author and source are credited.

**Funding:** MJW is supported by a Natural Environment Research Council PhD studentship (NER/S/A/2004/12980) at the University of Exeter (Cornwall Campus). BJG receives funding from the European Social Fund.

**Competing Interests:** The authors have declared that no competing interests exist.

\* To whom correspondence should be addressed. E-mail: b.j.godley@ex.ac.uk

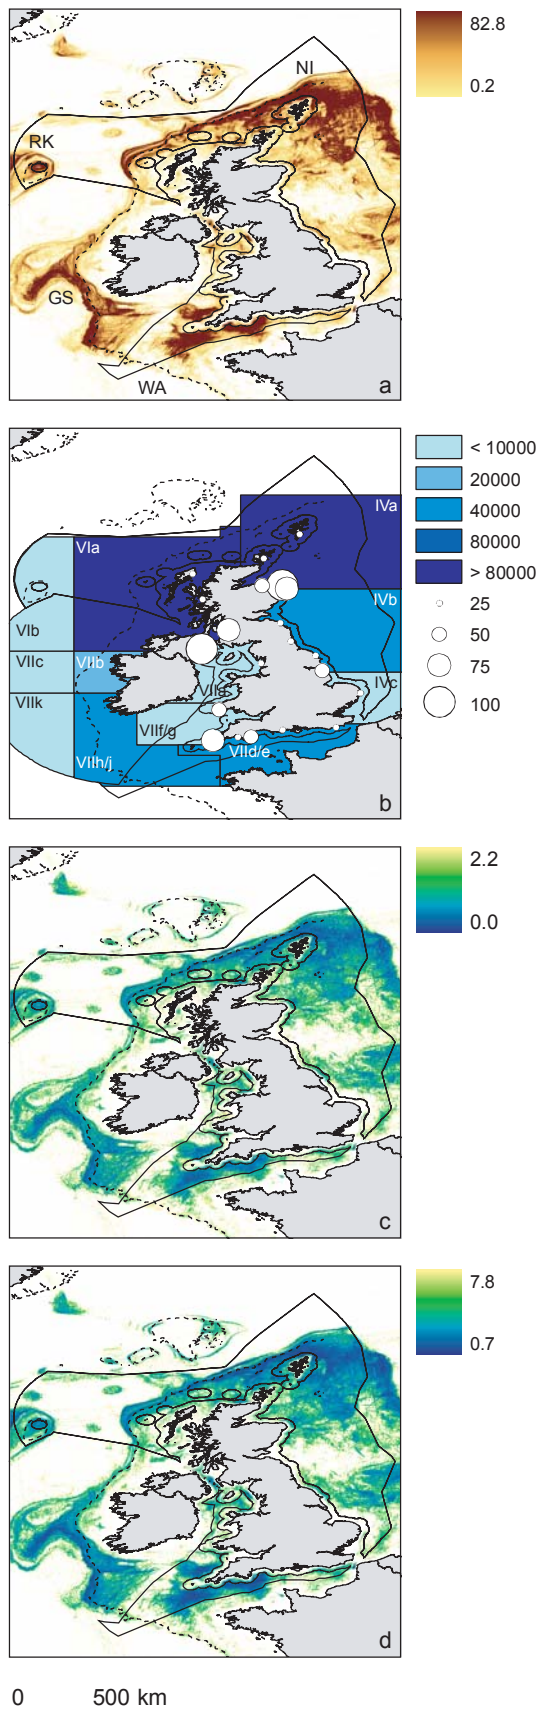

**Figure 1. a) Mean annual spatial distribution of fisheries activity derived from VMS records using a simple speed filter. The colour**

←

scale indicates the mean annual number of VMS derived data points within 9 km<sup>2</sup> pixels, solid line circumscribes the UK declared fishing zone, broken line is 200 m depth contour. Regional labels: Western Channel (WA), Goban Spur (GS), Rockall (RK) and Northern North Sea (NI). b) Tonnes of fish (demersal and pelagic) landed by UK registered vessels from the shown ICES statistical reporting boxes. Total number of vessels registered at main UK fishing ports greater than 17 metres in overall length (filled circles). All vessels for Northern Ireland have been mapped to Belfast. c) Coefficient of variation of the mean annual distribution of fisheries activity, lighter colours indicate areas of greatest variability in space-use, darker areas indicate regions of consistent space-use on annual time-scales. d) Coefficient of variation of the mean monthly distribution of fisheries activity, lighter colours indicate areas of greatest variability in space-use, darker areas indicate regions of consistent space-use on monthly time-scales.  
doi:10.1371/journal.pone.0001111.g001

correlation (Spearman rank order correlation  $r_s = 0.6$ ,  $P < 0.05$ ) between the levels of fishing activity and declared fish landed. Also insightful is the general correlation of fisheries hotspots with the magnitude of the number of vessels registered in proximate harbours (represented by the filled circles); for example, Newlyn in the southwest and Peterhead and Northern Ireland in the northeast and northwest respectively (Figure 1b).

It is highly likely that VMS data plots fishing activity with a much greater degree of precision than inferences that could be made from catch-book data. Is this high resolution picture predictable across years and across seasons as would be needed for efficient design of spatially explicit management? When we spatially map coefficient of variation (CV) among years (Figure 1c, annual mean maps in Figure S3) and across months (Figure 1d, mean monthly maps in Figure S4) it is clear that hotspots of fisheries activity are consistent through time.

## DISCUSSION

VMS was initially conceived to assist in the monitoring and control of fisheries activities and was legislated prior to changes in EU common fisheries policy [21], which emphasised a greater focus on understanding the effects of fishing at an ecosystem level. We show that VMS, while not designed to understand putative risk to marine ecosystems, can aid EU Member State's obligations under the Common Fisheries Policy and Habitats Directive to manage ecosystem impacts of fisheries. VMS mapping generates a spatially and temporal explicit view of fisheries activity at a far greater resolution than catch-book statistics. VMS data have great potential to highlight areas where the success of ecosystem management plans may be investigated.

The importance of the identified centres of fisheries activity (i.e. Western Channel and Celtic Sea, Northern North Sea and the Goban Spur) can be explained from biological and physical oceanographic perspectives. These are regions where seafloor topography and currents set up physical features that act to support upwelling, enhanced mixing, input of nutrient rich waters, or aid the development and maintenance of frontal systems that aggregate biological matter [22,23]. These features support primary and secondary productivity, the resulting energy of which is transferred to higher trophic levels within regional food webs. Such factors highlight why fisheries and many marine megavertebate species seeking prey occupy similar habitats.

With the increased resolution of spatio-temporal patterns of fisheries a step improvement in knowledge of the spatial distribution of species and habitats of conservation concern is required. This requirement has been met, in part, by UK and EU funded research on small cetaceans [8,24] and seabirds [25].

There are however statistical problems preventing the data from such studies being used as a full correlative data layer to compare with patterns of fisheries activity (i.e. merging species specific distribution and abundance data produced from differing survey methodologies; pers. comm. Simon Northridge–NERC Sea Mammal Research Unit, UK). More recently SCANS II, funded through the EU-LIFE program and participating EU Member States, has aided a more quantitative understanding of the spatial distribution and abundance of cetaceans [26]. Seasonal patterns of distribution and abundance are however still lacking and given the seasonal nature of fisheries such information is required to gain a coherent understanding of putative risk.

Although the VMS approach is a step forward in aiding the development of ecosystem management plans, there are a number of important caveats that must be considered in the interpretation of our findings, which suggest future directions for research. The fisheries activity maps are indicative of the spatial and temporal distribution of large UK-registered fishing vessels only. The patterns are therefore biased towards more offshore fishing activity and represent only a subset of the UK fleet. In addition, we only present data from the UK-registered fleet and not from other EU Member States operating in UK waters. The lack of these data does not detract from the utility of VMS data in providing a spatially and temporally explicit understanding of fisheries activity. Their absence does, however, highlight the need for integration with VMS data from other Member State vessels operating in UK domestic waters. A synoptic European view of fisheries activity will be essential for understanding the relationship between fisheries and migratory target and non-target species as they move seasonally between the waters of distant Member State.

The absence of metadata in the UK VMS on vessel gear type required us to use assumptions on movement speeds that most likely characterise fishing behaviour across several fishing methods employed by larger fishing vessels. In using a narrow range of speeds we believe we have been parsimonious in our estimation of when a vessel might be engaged in fishing. The common factor that a fishing vessel travels at slower speeds during fishing, gear deployment and retrieval, be it demersal or pelagic gear, provides a characteristic, albeit coarse, signal upon which to partition data. Expanding and contracting the width of the speed filter has the effect of widening or constricting the observed spatial patterns; what remain consistent are the identified centres of fisheries activity. Identification of these areas, their spatial range and their seasonality, provides important information for spatial management plans that could seek to manage fish stock extraction while mitigating risk to non-target species and habitats.

Not all fisheries techniques pose the same degree of risk to species and habitats of conservation concern, yet this lack of metadata does not prevent a coarse spatial interpretation of the putative risk posed to these groups as gear types, with their associated risks, are commonly deployed in known depths of water over particular habitat types. Moreover, non-target species adopt fairly predictable habitat utilisation patterns and physical habitats that represent areas of increased biodiversity can be mapped [27]. In deeper off-shore waters, such as those of the continental shelf-break, fishing vessel activity most likely represents pelagic techniques such as mid-water trawling and purse-seining. In shallower waters, fisheries activity will increasingly involve demersal techniques including bottom trawls and dredging. In the absence of robust metadata it may however, be possible to use behavioural rules on turning angles, bathymetry in the area of operation and information on movement patterns to help assist in more accurately characterising and spatially placing fishing behaviour. The development and implementation of electronic

logbook system for fisheries [28,29] may make a substantial contribution in European waters; providing spatially explicit information on gear deployment, duration of fishing and capture of target and non-target species.

Recent work to describe trawl intensity received by the seabed [30,31] highlights additional uses of VMS for ecosystem management. Such approaches help describe the amount of disturbance an area receives. When integrated with knowledge of benthic habitat type [27] and derived habitat sensitivity, VMS data might provide better ways to manage the seabed and the fish stocks they support. VMS may also have utility in assisting the designation and subsequent measurement of the effectiveness of Marine Protected Areas that function to conserve both target stock spawning biomass and non-target species and habitats. VMS could assist in optimally selecting such areas.

Notwithstanding the caveats, the simple and coherent patterns of habitat occupation by fishing vessels presented here suggest that fishing activity could be managed on a more finely resolved spatial and temporal basis. Furthermore, with multilateral collaboration VMS technologies may offer an important solution to quantifying and managing ecosystem disturbance particularly on the high-seas, which has become evermore important as fisheries move into deeper [32] and more distant waters.

## MATERIALS AND METHODS

### Vessel Monitoring System

The Vessel Monitoring System (VMS) is an automated method of recording the location of fishing vessels at sea. The system consists of a tamper-proof installation onboard fishing vessels registered in the UK and was introduced under European Commission legislation (EC 686/97). Each unit consists of a global positioning satellite (GPS) receiver; a satellite transmitter and a power backup that will last approximately 72 hours [33]. From the year 2000, these units were mandatory for fishing vessels greater than 24 metres overall length, from 2004 they were mandatory for vessels greater than 18 metres length and from 2005 for vessels greater than 15 metres overall length. VMS units are required to report 99% of all locations accurate to within 500 metres [33,34]. VMS units operating in UK waters report location and ancillary data (i.e. speed and heading), via satellite communication, on a 2-hour duty cycle to the UK Fisheries Monitoring Centre (FMC). The FMC may request the location of a fishing vessel at any time from the VMS unit. VMS units can also be tasked to increase the reporting frequency within certain regions or within the waters of other EU Member States.

### VMS dataset

VMS data were obtained from the UK Sea Fisheries Inspectorate in 2005 (now the Marine and Fisheries Agency of the Department for Environment, Food and Rural Affairs). This dataset contained 5,788,188 records. Each record contained geographic coordinates in decimal degrees (World Geodetic System 1984 format) an accompanying time stamp in UTC and a vessel identification number. All received data were anonymous with respect to their vessel registration numbers, dimensions and administrative ports. The mean number of VMS records per year (see Figure S1a) was  $840,182 \pm 60,346$  SD (range 756,863 to 926,363). Filters were applied to the VMS dataset to remove: a) erroneous geographic records outside the range 90°S to 90°N, −180°W to 180°E, b) records outside the 5 year study period, set to be 01-01-2000 to 31-12-2004, and c) records with elevations greater than 50 metres above sea-level as determined from the TerrainBase digital elevation model [35]. The number of vessel identification numbers

appearing in the dataset declined annually (from 422 in 2000 to 334 in 2004, see Figure S1b); however, new identification numbers were introduced annually to the dataset during the study period (2001  $n = 23$ , 2002  $n = 26$ , 2003  $n = 20$  and 2004  $n = 32$ ).

### Route reconstruction

Fishing trips were reconstructed as follows: a 5 km buffer zone was constructed around the coastline of Europe, this was used to determine when vessels were leaving or nearing ports. All records belonging to a vessel were assigned a logical flag (1 or 0) to indicate whether they were inside or outside this coastal buffer zone. The start and finish of a fishing trip was determined when a vessel moved out of and back into the zone with respect to time. Records occurring within the buffer zone were discarded. A speed filter was applied to remove improbable locations; this process removed locations necessitating travel speeds greater than  $100 \text{ km hr}^{-1}$  ( $\sim 55$  knots) between time adjacent locations. The filter was triggered on 1,015 trips and removed 6,891 records.

Potential trips were discarded if they contained  $\leq 3$  VMS records, or were  $\leq 6$  hours in duration or had transmission breaks  $\geq 5$  days; removing 28,800; 12,121 and 168,549 records respectively (in total 3.6% of the original dataset). It is likely that these filters remove some legitimate fishing trips of short duration and may underestimate near-shore fishing effort. However, they were required to minimising the degree of visual supervision needed to manage this large dataset while maximising retention of VMS data. Post filtering the dataset contained 56,434 fishing trips (see Figure S2).

The modal frequency of record transmission was 2 hours (see Figure S1c). To ensure temporal consistency among data, all trips were re-sampled where necessary to a  $2 \text{ hour} \pm 15$  minutes frequency using great circle, speed-appropriate, principles. This process maximised the retention of transmitted records, only filling temporal gaps where necessary and resulted in a 14% reduction from pre-treated data, making available 3,635,855 data points. The mean net change in the number of data points following this temporal alignment process for each trip was  $-8.9$ ; 28,320 trips experienced a net addition, receiving an average of  $10 \pm 19$  data points, 13,986 trips experienced a net reduction, losing an average of  $56 \pm 198$  VMS records; 14,776 trips experienced no adjustment in their temporal frequency.

### Vessel behaviour

A speed rule was used to distinguish fishing from steaming or near-stationary movement. It was necessary to construct derived speeds for all VMS records as prior to 1-1-2006 transmission of speed and heading was not mandatory [34]. Derived speeds represent the speed of movement between time adjacent records within a fishing trip. We compared transmitted vessel speeds available from 40,681 fishing trips (3,126,213 VMS records) to comparative derived speeds to ensure that these speeds were closely mirrored. The process identified 78.9% of fishing trips yielded statistically significant positive correlations between transmitted and derived speeds (Pearson correlation coefficient;  $p \leq 0.05$ ; mean  $r^2 = 0.6$  for all fishing trips). The speed filtering process assigned 1,710,725 data points (47% of available data) as representing fishing activity (see Figure S2).

The upper and lower speed thresholds for determining fisheries activity were influenced by the frequency distribution of vessel speeds (see Figure S1d), and from published values [30,31,36]. As the UK VMS database retains incomplete data on vessel gear type

and vessels can change their gear seasonally it was necessary for the speed rule to encompass many types of fisheries activities, for example beam trawling, gill netting and longlining. The lack of metadata prevents VMS data from being partitioned by gear type. Fishing activity was therefore assigned to all vessels travelling at speeds  $\geq 3.0$  and  $\leq 10.0 \text{ km h}^{-1}$ , ( $\sim 1.5$  to 5.5 knots). While this approach is a coarse manner in which to filter the data, the assigned limits circumscribes the speeds at which larger vessels move while undertaking fisheries activities.

### Mapping fisheries activity

Fisheries activity was gridded at a spatial resolution of  $9 \text{ km}^2$  (3 km by 3 km pixel) by summing the number of VMS derived data points coincident to each pixel over monthly and annual scales.

## SUPPORTING INFORMATION

**Figure S1** a) Number of VMS records ( $\times 10^4$ ) per year, b) number of vessel identification numbers active each year (filled bars) and cumulative increase in vessel identification numbers appearing each year in the VMS dataset (empty bars), c) frequency histogram of time elapsed (hours) between transmission of time adjacent records for all vessels in the 5 year VMS dataset, d) frequency histogram of transmitted and derived speeds (filled and empty bars respectively) for 3,126,042 VMS records, and e) frequency histogram of transmitted and derived headings (filled and empty bars respectively) for 3,126,042 VMS derived data points.

Found at: doi:10.1371/journal.pone.0001111.s001 (0.03 MB DOC)

**Figure S2** Data handling/filtering process applied to the VMS dataset.

Found at: doi:10.1371/journal.pone.0001111.s002 (0.05 MB DOC)

**Figure S3** Mean annual maps of fishing activity (vessels moving  $\geq 3$  and  $\leq 10 \text{ km h}^{-1}$ ) for the period 2000–2004. Maps show the mean number of data points at each pixel, where darker colour indicates greater number of visits by vessels travelling at speeds most likely to indicate fisheries activity.

Found at: doi:10.1371/journal.pone.0001111.s003 (4.12 MB EPS)

**Figure S4** Mean monthly maps of fishing activity (vessels moving  $\geq 3$  and  $\leq 10 \text{ km h}^{-1}$ ) for the period 2000–2004. Maps show the mean number of data points at each pixel, where darker colour indicates greater number of visits by vessels travelling at speeds most likely to indicate fisheries activity.

Found at: doi:10.1371/journal.pone.0001111.s004 (9.28 MB EPS)

## ACKNOWLEDGMENTS

We thank K. Porter (Department for Environment, Food and Rural Affairs) for assistance in obtaining VMS data. We thank S. Northridge (Sea Mammal Research Unit, UK) and J. Reid (Joint Nature Conservation Council, UK) for constructive criticism during the analytical phase of this work. We thank L. Hawkes for comments on drafts of the manuscript.

## Author Contributions

Conceived and designed the experiments: MW BG. Performed the experiments: MW. Analyzed the data: MW. Contributed reagents/materials/analysis tools: MW. Wrote the paper: MW BG. Other: Co-devised the analysis: BG.

## REFERENCES

1. Pauly D, Christensen V, Guenette S, Pitcher TJ, Sumaila UR, et al. (2002) Towards sustainability in world fisheries. *Nature* 418: 689–695.
2. Zeller D, Pauly D (2005) Good news, bad news: global fisheries discards are declining, but so are total catches. *Fish and Fisheries* 6: 156–159.
3. Hall MA, Alverson DL, Metzals KI (2000) By-catch: Problems and solutions. *Marine Pollution Bulletin* 41: 204–219.
4. Lewison RL, Crowder LB (2003) Estimating fishery bycatch and effects on a vulnerable seabird population. *Ecological Applications* 13: 743–753.
5. Lewison RL, Crowder LB, Read AJ, Freeman SA (2004) Understanding impacts of fisheries bycatch on marine megafauna. *Trends in Ecology & Evolution* 19: 598–604.
6. Myers RA, Worm B (2005) Extinction, survival or recovery of large predatory fishes. *Philosophical Transactions of the Royal Society B* 360: 13–20.
7. Votier SC, Furness RW, Bearhop S, Crane JE, Caldow RWG, et al. (2004) Changes in fisheries discard rates and seabird communities. *Nature* 427: 727–730.
8. Hammond PS, Benke H, Berggren P, Borchers DL, Buckland ST, et al. (1995) Distribution and abundance of the harbour porpoise and other small cetaceans in the North Sea and adjacent waters. Final report to the European Commission under contract LIFE 92-2/UK/27.
9. Sims DW, Southall EJ, Richardson AJ, Reid PC, Metcalfe JD (2003) Seasonal movements and behaviour of basking sharks from archival tagging: no evidence of winter hibernation. *Marine Ecology-Progress Series* 248: 187–196.
10. Croxall JP, Silk JRD, Phillips RA, Afanasyev V, Briggs DR (2005) Global circumnavigations: Tracking year-round ranges of nonbreeding albatrosses. *Science* 307: 249–250.
11. Bearhop S, Thompson DR, Phillips RA, Waldron S, Hamer KC, et al. (2001) Annual variation in Great Skua diets: The importance of commercial fisheries and predation on seabirds revealed by combining dietary analyses. *The Condor* 103: 802–809.
12. Bowen BW, Bass AL, Soares L, Toonen RJ (2005) Conservation implications of complex population structure: lessons from the loggerhead turtle (*Caretta caretta*). *Molecular Ecology* 14: 2389–2402.
13. Northridge S, Morizur Y, Souami Y, Canneyt Ov (2006) PETRACET: Project EC/FISH/2003/09. Final report to the European Commission 1735R07D. Lymington, UK: MacAlister Elliott and Partners Ltd. 29 p.
14. Carranza A, Domingo A, Estrades A (2006) Pelagic longlines: A threat to sea turtles in the Equatorial Eastern Atlantic. *Biological Conservation* 131: 52–57.
15. Phillips RA, Silk JRD, Croxall JP, Afanasyev V (2006) Year-round distribution of white-chinned petrels from South Georgia: relationships with oceanography and fisheries. *Biological Conservation* 129: 336–347.
16. Molenarr EJ, Tsamenyi M (2000) Satellite-based vessel monitoring systems international legal aspects and developments in state practice. In: Organisation FaA, United Nations. 44 p.
17. Department for Environment Food and Rural Affairs (2004) Explanatory memorandum to the south-west territorial waters (prohibition of pair trawling) order 2004-No. 3397. 8 p.
18. Gilkinson KD, Gordon DC, MacIsaac KG, McKeown DL, Kenchington ELR, et al. (2005) Immediate impacts and recovery trajectories of macrofaunal communities following hydraulic clam dredging on Banquereau, eastern Canada. *ICES Journal of Marine Science* 62: 925–947.
19. Department for Environment Food and Rural Affairs (2005) Charting progress: An integrated assessment of the state of the UK seas. 119 p.
20. Marine Fisheries Agency (2005) United Kingdom Sea Fisheries Statistics 2004. London.
21. Council of the European Union (2002) Council Regulation (EC) No 2371/2002 of 20 December 2002 on the conservation and sustainable exploitation of fisheries resources under the Common Fisheries Policy. 22 p.
22. Le Fevre J (1986) Aspects of the Biology of Frontal Systems. *Advances in Marine Biology* 23: 163–299.
23. Huthnance JM, Coelho H, Griffiths CR, Knight PJ, Rees AP, et al. (2001) Physical structures, advection and mixing in the region of Goban spur. *Deep Sea Research Part II: Topical Studies in Oceanography* 48: 2979–3021.
24. Reid JB, Evans PGH, Northridge SP (2003) Atlas of cetacean distribution in north-west European waters. Peterborough, UK: Joint Nature Conservation Committee. 76 p.
25. Stone C, Webb A, Barton C, Ratcliffe N, Reed T, et al. (1995) An atlas of seabird distribution in north-west European waters. Peterborough, UK: Joint Nature Conservation Committee.
26. Hammond PS (2007) Final report on Small Cetacean Abundance in the European Atlantic and North Sea (SCANS-II). Department for Environment, Food and Rural Affairs.
27. Connor DW, Gilliland PM, Golding N, Robinson P, Todd D, et al. (2006) UKSeaMap: the mapping of seabed and water column features of UK seas. Peterborough, UK: Joint Nature Conservation Committee. 104 p.
28. Gallaway BJ, Cole JG, Martin LR (2003) Description of a simple electronic logbook designed to measure effort in the Gulf of Mexico shrimp fishery. *North American Journal of Fisheries Management* 23: 581–589.
29. Commission of the European Communities (2004) Proposal for a Council regulation on electronic recording and reporting of fishing activities and on means of remote sensing. No 724-2004.
30. Deng R, Dichmont C, Milton D, Haywood M, Vance D, et al. (2005) Can vessel monitoring system data also be used to study trawling intensity and population depletion? The example of Australia's prawn fishery. *Canadian Journal of Fisheries and Aquatic Sciences* 62: 611–622.
31. Mills CM, Townsend SE, Jennings S, Eastwood PD, Houghton CA (2007) Estimating high resolution trawl fishing effort from satellite-derived vessel monitoring system data. *ICES Journal of Marine Science* 64: 248–255.
32. Pauly D, Alder J, Bennett E, Christensen V, Tydemers P, et al. (2003) The Future for Fisheries. *Science* 302: 1359–1361.
33. Department for Environment Food and Rural Affairs (2005) Satellite Monitoring: UK fishing boats satellite-tracking device specifications. 4 p.
34. Department for Environment Food and Rural Affairs (2005) Satellite Monitoring: Notes for Guidance. 4 p.
35. National Geophysical Data Centre (2007) <http://www.gfdl.noaa.gov/products/vis/data/datasets/TerrainBase.html>.
36. Murawski SA, Wigley SE, Fogarty MJ, Rago PJ, Mountain DG (2005) Effort distribution and catch patterns adjacent to temperate MPAs. *ICES Journal of Marine Science* 62: 1150–1167.
